# Supplementary material for: Accurate three-body noncovalent interactions: the insights from energy decomposition
Source: Royal Society of Chemistry journal article supplement (doi:10.1039/d3cp03938b), 2023-01-01
Supplement: d3cp03938b1.pdf [file d3cp03938b1.pdf]

Supplementary Information for  
“Accurate Three-body Noncovalent Interactions: the  
Insights from Energy Decomposition”

Sharon Ochieng and Konrad Patkowski  
*Department of Chemistry and Biochemistry, Auburn University,  
Auburn, Alabama 36849, United States*

October 5, 2023

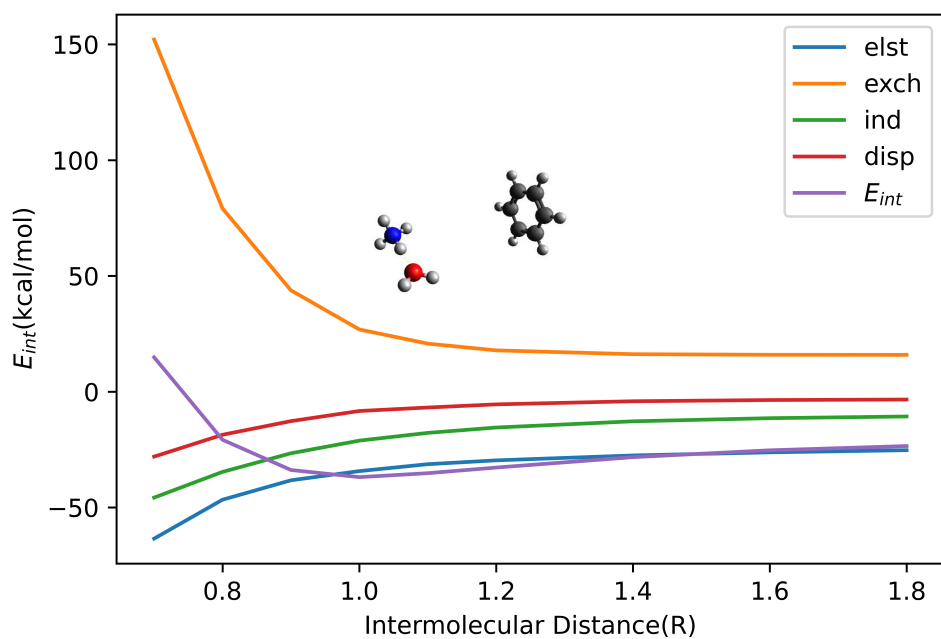

Figure 1: Two-body SAPT(DFT) energy decompositions along the radial benchmark potential energy curves for the ammonium-benzene-water complex 4.1. They are obtained by shifting  $C_6H_6$  relative to the center of mass of the entire complex. The relative geometry of the other two molecules stays unchanged.

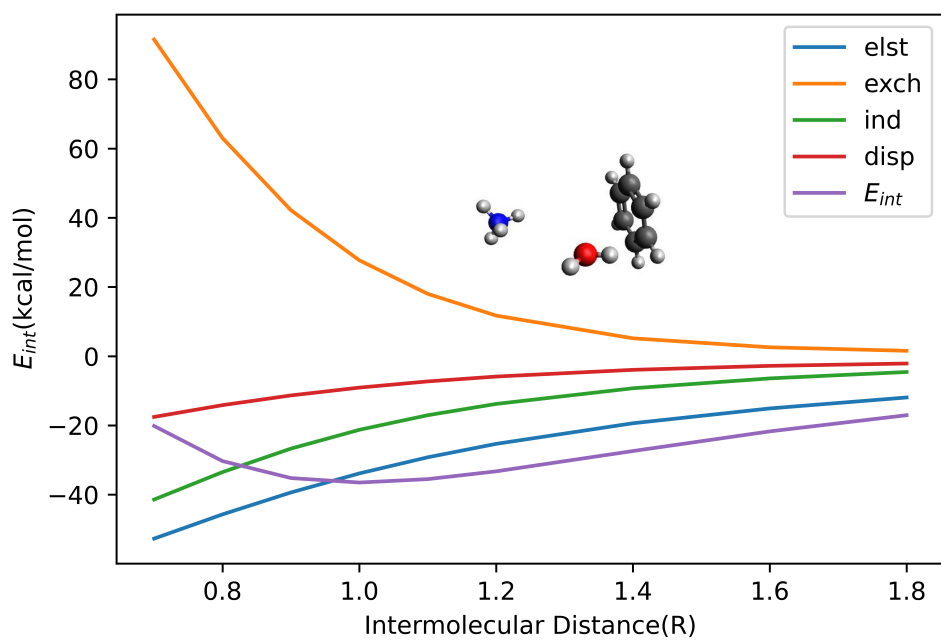

Figure 2: Two-body SAPT(DFT) energy decompositions along the radial benchmark potential energy curves for the ammonium-benzene-water complex 4.1. They are obtained by shifting  $\text{NH}_4^+$  relative to the center of mass of the entire complex. The relative geometry of the other two molecules stays unchanged.

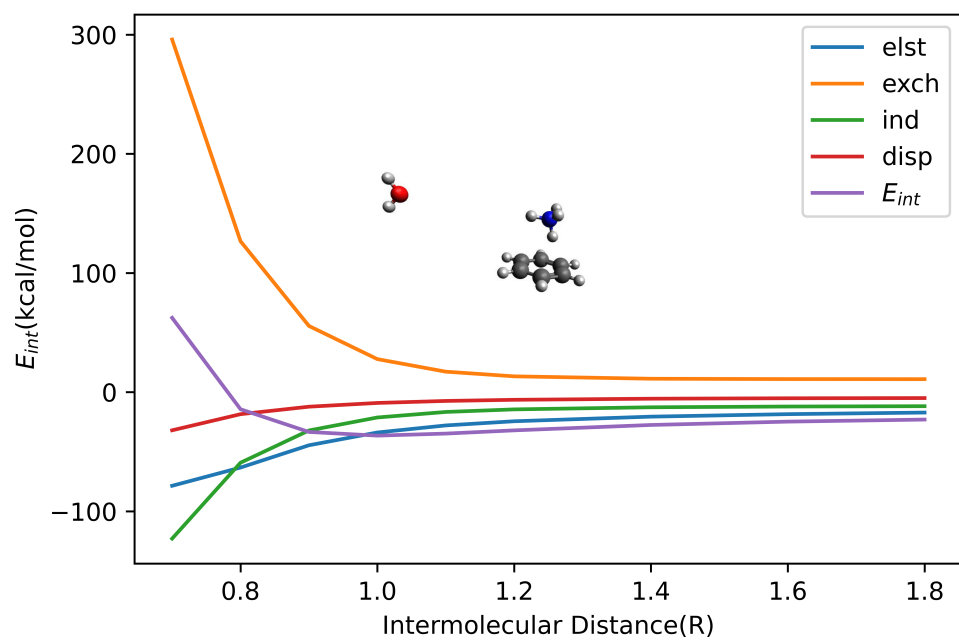

Figure 3: Two-body SAPT(DFT) energy decompositions along the radial benchmark potential energy curves for the ammonium-benzene-water complex 4.1. They are obtained by shifting  $\text{H}_2\text{O}$  relative to the center of mass of the entire complex. The relative geometry of the other two molecules stays unchanged.

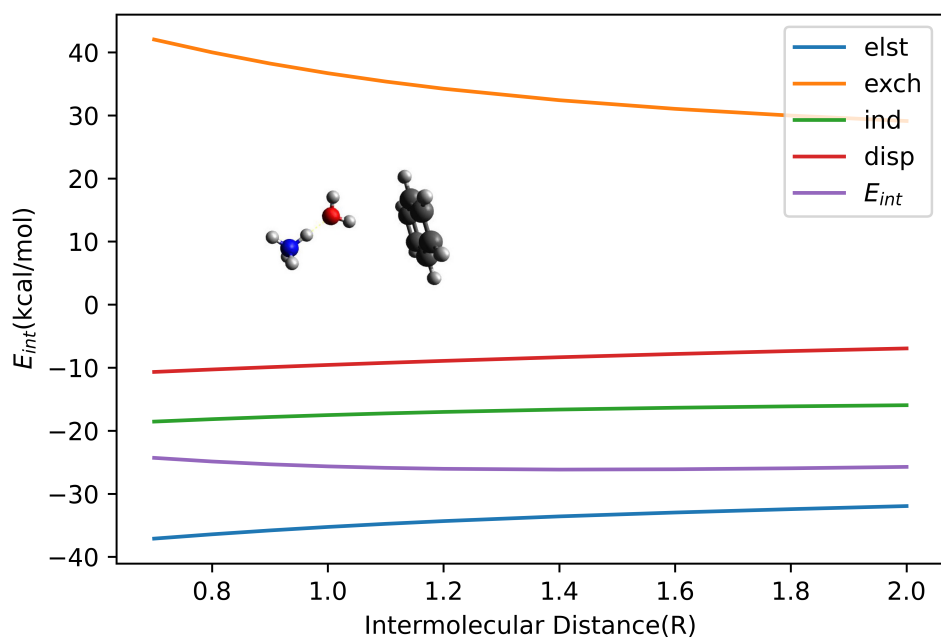

Figure 4: Two-body SAPT(DFT) energy decompositions along the radial benchmark potential energy curves for the ammonium-benzene-water complex 4.2. They are obtained by shifting  $C_6H_6$  relative to the center of mass of the entire complex. The relative geometry of the other two molecules stays unchanged.

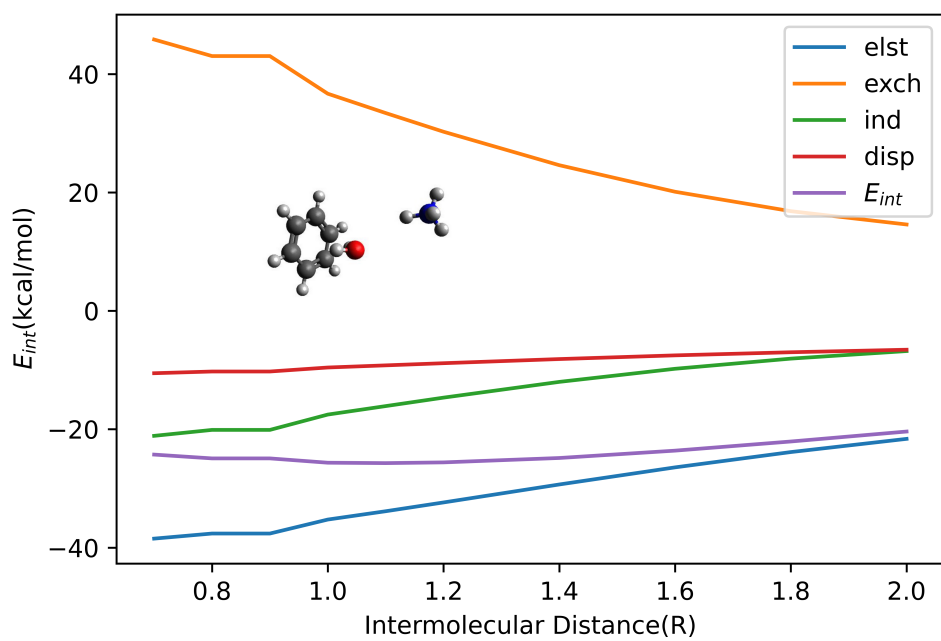

Figure 5: Two-body SAPT(DFT) energy decompositions along the radial benchmark potential energy curves for the ammonium-benzene-water complex 4.2. They are obtained by shifting  $NH_4^+$  relative to the center of mass of the entire complex. The relative geometry of the other two molecules stays unchanged.

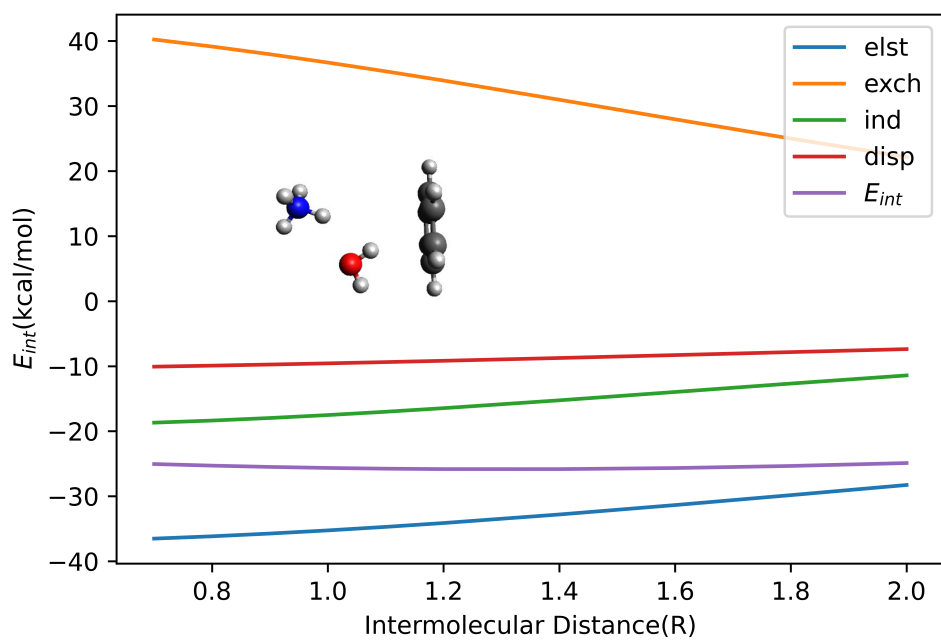

Figure 6: Two-body SAPT(DFT) energy decompositions along the radial benchmark potential energy curves for the ammonium-benzene-water complex 4.2. They are obtained by shifting  $H_2O$  relative to the center of mass of the entire complex. The relative geometry of the other two molecules stays unchanged.

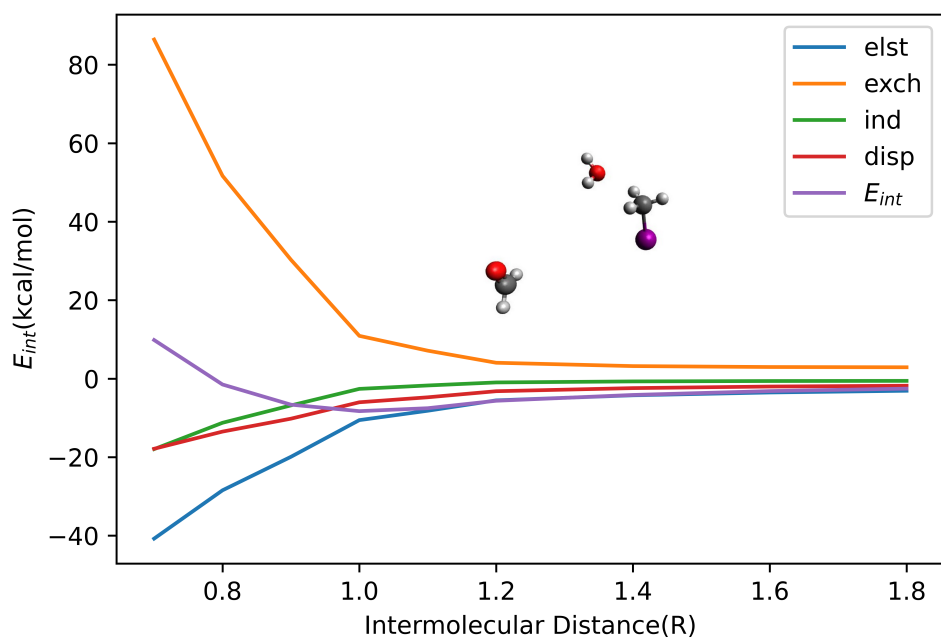

Figure 7: Two-body SAPT(DFT) energy decompositions along the radial benchmark potential energy curves for the iodomethane-formaldehyde-water complex 1.1. They are obtained by shifting HCHO relative to the center of mass of the entire complex. The relative geometry of the other two molecules stays unchanged.



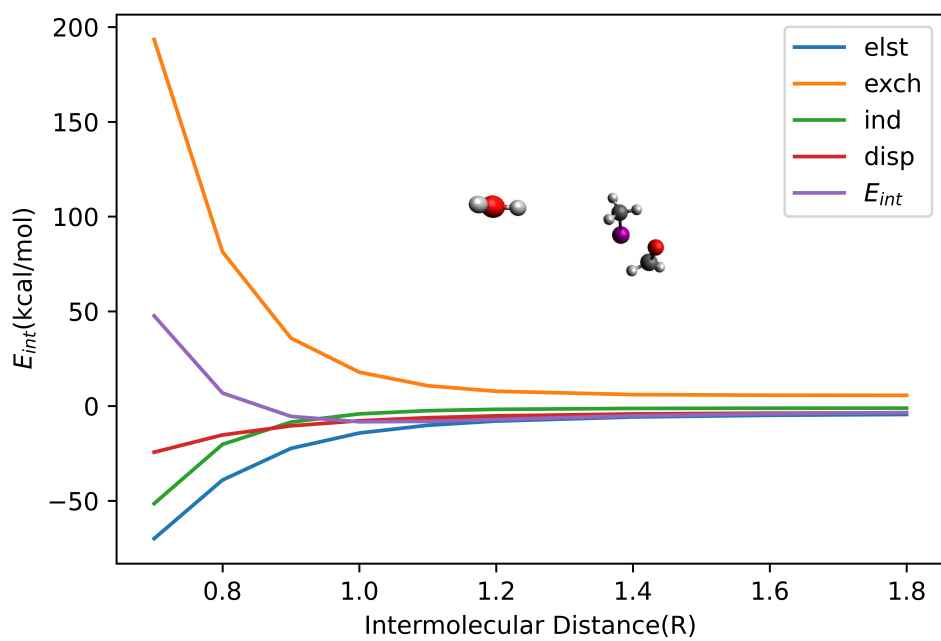

Figure 8: Two-body SAPT(DFT) energy decompositions along the radial benchmark potential energy curves for the iodomethane-formaldehyde-water complex 1.1. They are obtained by shifting  $\text{H}_2\text{O}$  relative to the center of mass of the entire complex. The relative geometry of the other two molecules stays unchanged.

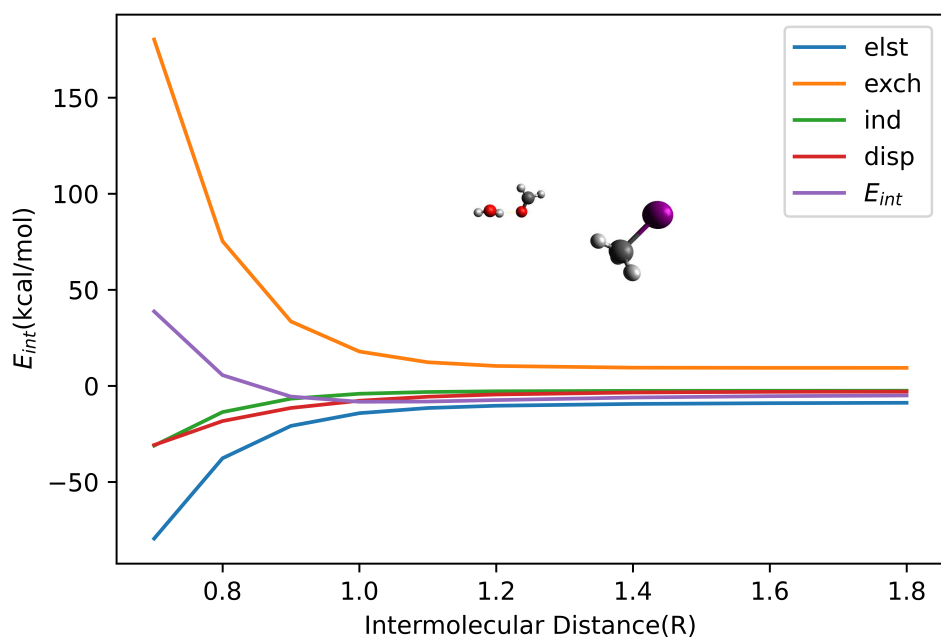

Figure 9: Two-body SAPT(DFT) energy decompositions along the radial benchmark potential energy curves for the iodomethane-formaldehyde-water complex 1.1. They are obtained by shifting  $\text{CH}_3\text{I}$  relative to the center of mass of the entire complex. The relative geometry of the other two molecules stays unchanged.

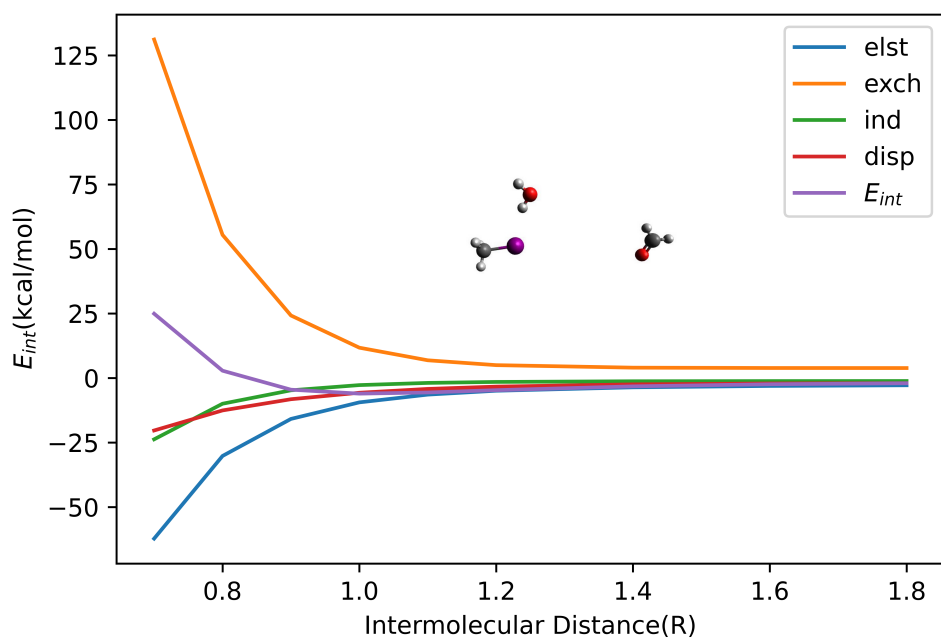

Figure 10: Two-body SAPT(DFT) energy decompositions along the radial benchmark potential energy curves for the iodomethane-formaldehyde-water complex complex 1.2. They are obtained by shifting HCHO relative to the center of mass of the entire complex. The relative geometry of the other two molecules stays unchanged.

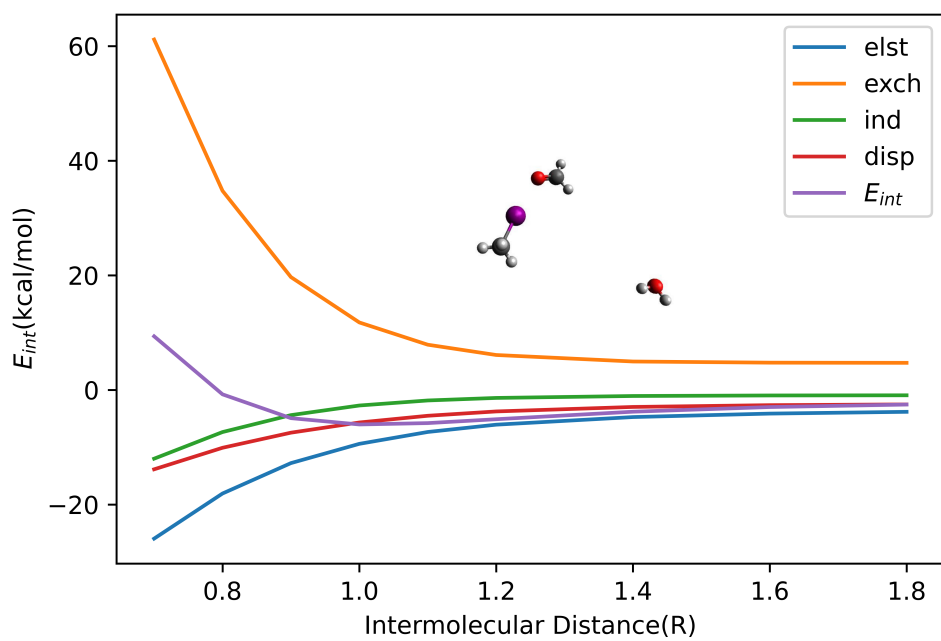

Figure 11: Two-body SAPT(DFT) energy decompositions along the radial benchmark potential energy curves for the iodomethane-formaldehyde-water complex complex 1.2. They are obtained by shifting  $H_2O$  relative to the center of mass of the entire complex. The relative geometry of the other two molecules stays unchanged.

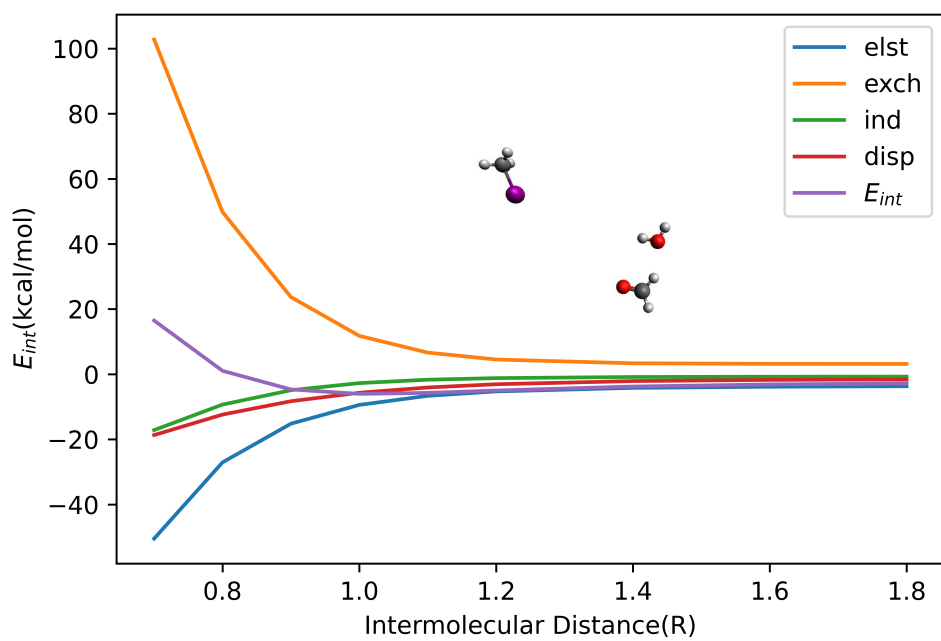

Figure 12: Two-body SAPT(DFT) energy decompositions along the radial benchmark potential energy curves for the iodomethane-formaldehyde-water complex 1.2. They are obtained by shifting  $\text{CH}_3\text{I}$  relative to the center of mass of the entire complex. The relative geometry of the other two molecules stays unchanged.

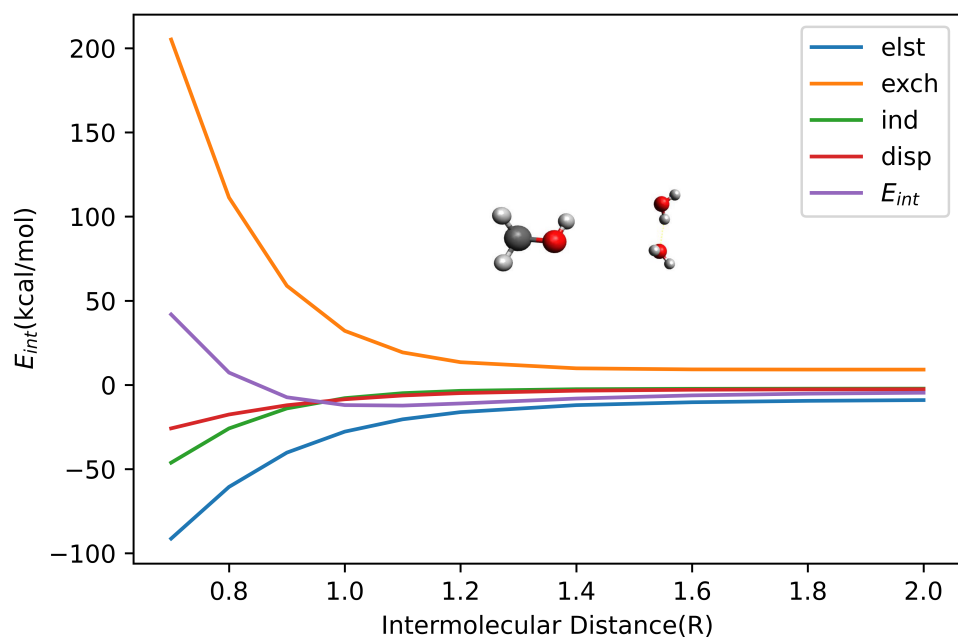

Figure 13: Two-body SAPT(DFT) energy decompositions along the radial benchmark potential energy curves for the water-water-methanol 3.1. They are obtained by shifting  $\text{CH}_3\text{OH}$  relative to the center of mass of the entire complex. The relative geometry of the other two molecules stays unchanged.

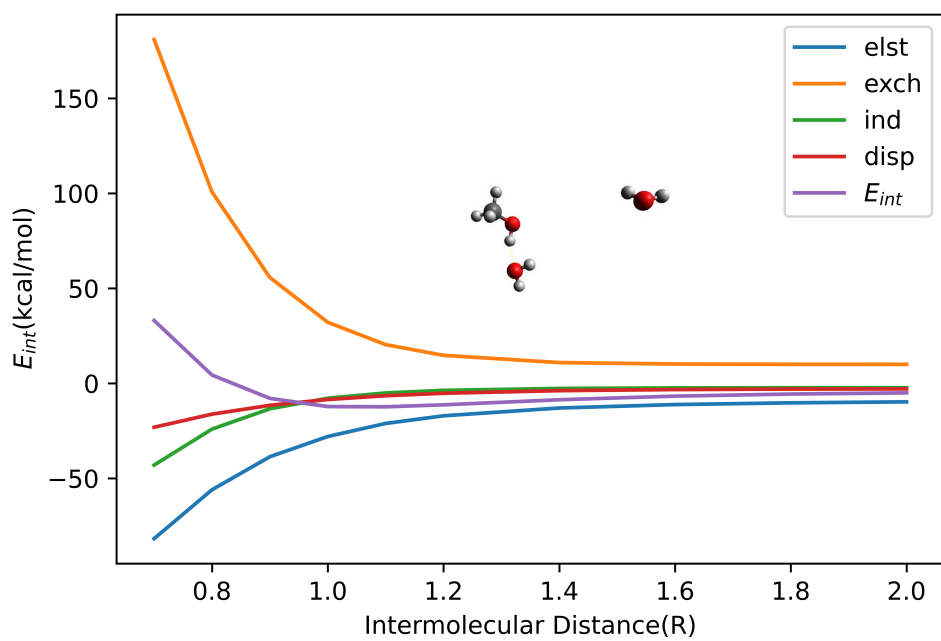

Figure 14: Two-body SAPT(DFT) energy decompositions along the radial benchmark potential energy curves for the water-water-methanol 3.1. They are obtained by shifting  $\text{H}_2\text{O}(\text{a})$  relative to the center of mass of the entire complex. The relative geometry of the other two molecules stays unchanged.

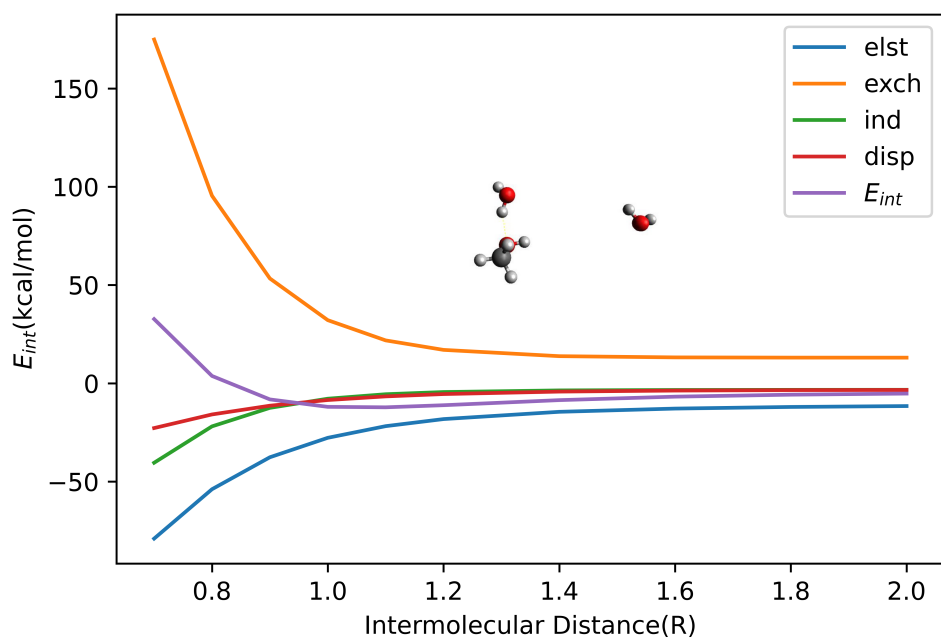

Figure 15: Two-body SAPT(DFT) energy decompositions along the radial benchmark potential energy curves for the water-water-methanol 3.1. They are obtained by shifting  $H_2O(b)$  relative to the center of mass of the entire complex. The relative geometry of the other two molecules stays unchanged.



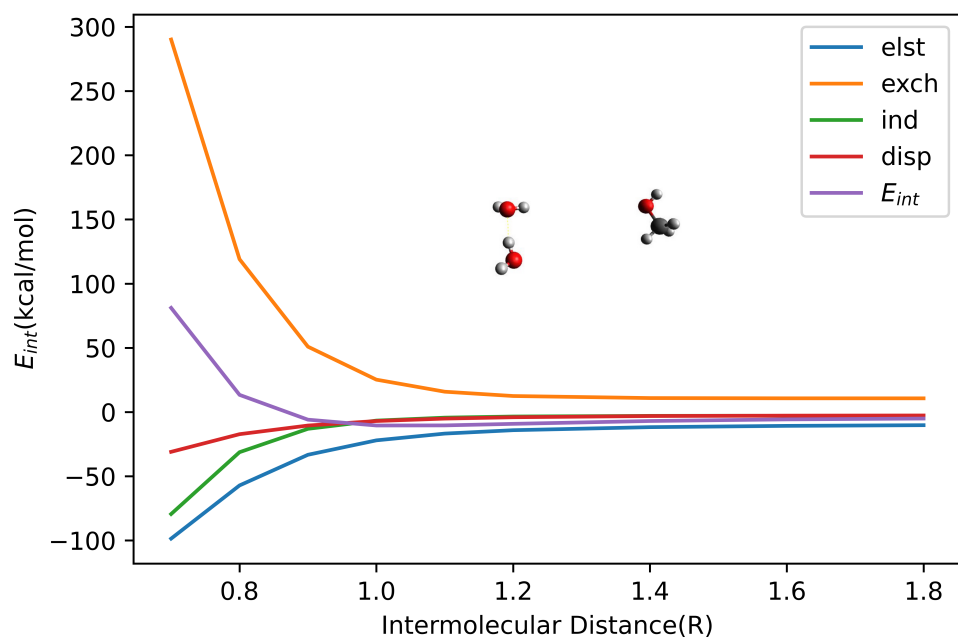

Figure 16: Two-body SAPT(DFT) energy decompositions along the radial benchmark potential energy curves for the water-water-methanol 3.2. They are obtained by shifting  $\text{CH}_3\text{OH}$  relative to the center of mass of the entire complex. The relative geometry of the other two molecules stays unchanged.

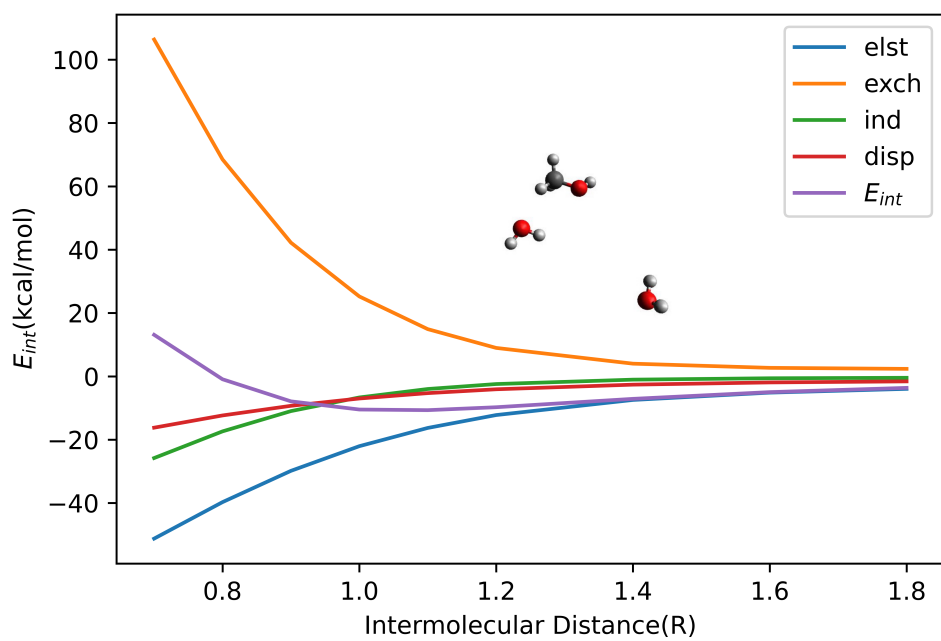

Figure 17: Two-body SAPT(DFT) energy decompositions along the radial benchmark potential energy curves for the water-water-methanol 3.2. They are obtained by shifting  $H_2O(a)$  relative to the center of mass of the entire complex. The relative geometry of the other two molecules stays unchanged.

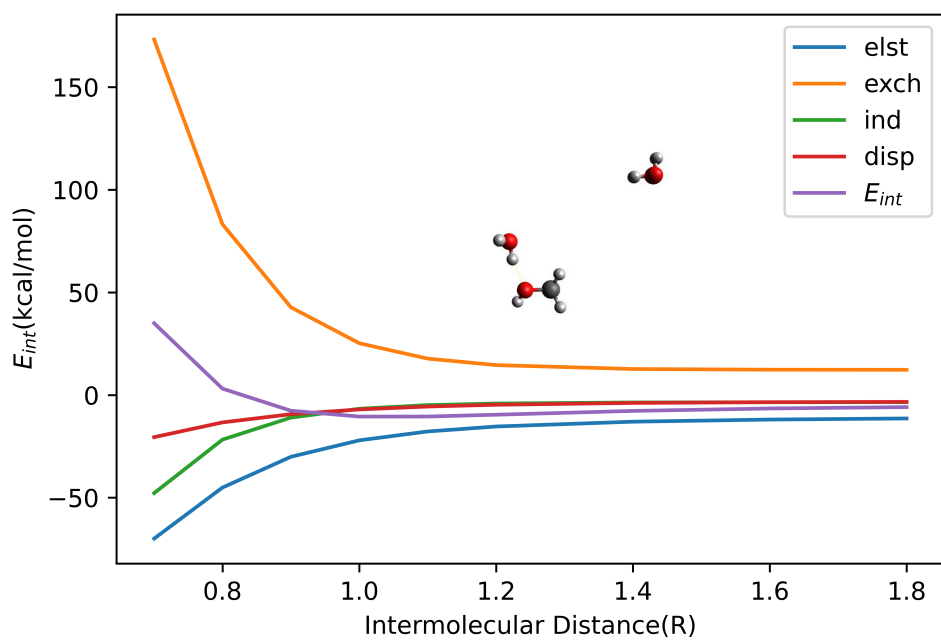

Figure 18: Two-body SAPT(DFT) energy decompositions along the radial benchmark potential energy curves for the water-water-methanol 3.2. They are obtained by shifting  $H_2O(b)$  relative to the center of mass of the entire complex. The relative geometry of the other two molecules stays unchanged.
